# Supplementary material
Source: MDPI journal article supplement (https://www.mdpi.com/2073-4395/12/6/1377)
Supplement: s1 [file s1]

**Table S1.** Physical, physico-chemical and chemical characteristics of the substrates studied analysed with ANOVA and post-hoc Tukey-b test.

| Substrates        | pH        | EC<br>(dS m <sup>-1</sup> ) | TPS<br>(% vol) | BD<br>(g cm <sup>3</sup> ) | TWHC<br>(mL L <sup>-1</sup> ) | Shrinkage<br>(% vol) | AC<br>(% vol) | OM<br>(%) | TN<br>(%) | WSK<br>(mg L <sup>-1</sup> ) | WSNa<br>(mg L <sup>-1</sup> ) | NO <sub>3</sub> <sup>-</sup><br>(mg L <sup>-1</sup> ) | SO <sub>4</sub> <sup>2-</sup><br>(mg L <sup>-1</sup> ) | Cl <sup>-</sup><br>(mg L <sup>-1</sup> ) |
|-------------------|-----------|-----------------------------|----------------|----------------------------|-------------------------------|----------------------|---------------|-----------|-----------|------------------------------|-------------------------------|-------------------------------------------------------|--------------------------------------------------------|------------------------------------------|
| Coir fibre (100%) | 6.71cde   | 0.33a                       | 95.2klm        | 0.072b                     | 520k                          | 14.3def              | 43.2d         | 93.3mn    | 0.76a     | 357a                         | 268a                          | 5.16a                                                 | 60.3a                                                  | 199a                                     |
| PL (20%)          | 6.11a     | 0.64ab                      | 94.1jkl        | 0.088c                     | 423fg                         | 15.1efg              | 51.8f         | 93.7mn    | 0.81ab    | 717b                         | 327ab                         | 4.32a                                                 | 187ab                                                  | 484ab                                    |
| PL (40%)          | 6.11a     | 0.95abc                     | 95.1klm        | 0.073b                     | 369c                          | 11.6bcd              | 58.2g         | 94.1mn    | 0.95bc    | 1020bc                       | 516b                          | 7.51a                                                 | 225ab                                                  | 793bcd                                   |
| PL (60%)          | 6.17ab    | 1.10bc                      | 95.0klm        | 0.075b                     | 314c                          | 7.44a                | 63.6h         | 93.4mn    | 1.04c     | 1322c                        | 529b                          | 5.47a                                                 | 228ab                                                  | 872cd                                    |
| PL (80%)          | 6.25abcd  | 1.23bc                      | 95.3lm         | 0.070b                     | 251b                          | 7.98a                | 70.2i         | 92.8lm    | 1.18d     | 1787d                        | 554b                          | 5.25a                                                 | 168ab                                                  | 746bcd                                   |
| PL (100%)         | 6.34abcde | 1.21bc                      | 96.2m          | 0.057a                     | 140a                          | 7.30a                | 82.3j         | 91.9l     | 1.34e     | 1347c                        | 397ab                         | 4.59a                                                 | 236ab                                                  | 1057def                                  |
| PT (20%)          | 7.49i     | 0.98abc                     | 93.8ijk        | 0.095c                     | 479ij                         | 12.9cde              | 45.8de        | 88.3j     | 0.74a     | 1145c                        | 529b                          | 6.19a                                                 | 260ab                                                  | 522abc                                   |
| PT (40%)          | 7.23fghi  | 1.35cd                      | 92.0gh         | 0.121d                     | 465i                          | 10.2abc              | 45.5de        | 89.4k     | 0.95bc    | 1385c                        | 554b                          | 18.1a                                                 | 441bc                                                  | 904de                                    |
| PT (60%)          | 7.29hi    | 1.90de                      | 90.4ef         | 0.150e                     | 421fg                         | 11.7bcd              | 48.2e         | 84.8hi    | 0.98c     | 2417ef                       | 780c                          | 124a                                                  | 662cd                                                  | 1429g                                    |
| PT (80%)          | 7.23fghi  | 2.24ef                      | 89.3de         | 0.168fg                    | 408ef                         | 9.24ab               | 48.5e         | 84.1h     | 1.00c     | 2291e                        | 806c                          | 154a                                                  | 867cd                                                  | 1838h                                    |
| PT (100%)         | 7.28ghi   | 2.61fg                      | 87.5c          | 0.195h                     | 393e                          | 7.70a                | 48.1e         | 85.2i     | 1.27de    | 2694fg                       | 818c                          | 200a                                                  | 1073e                                                  | 2386ij                                   |
| LC (20%)          | 6.27abcd  | 2.30ef                      | 93.7ijk        | 0.100c                     | 456hi                         | 17.4fgh              | 48.1e         | 72.2g     | 2.40i     | 1158c                        | 541b                          | 2209bc                                                | 2018g                                                  | 724bcd                                   |
| LC (40%)          | 6.14a     | 3.83h                       | 92.6hi         | 0.127d                     | 437gh                         | 17.7fgh              | 48.9e         | 66.1f     | 2.69j     | 1938d                        | 856c                          | 5516d                                                 | 3722j                                                  | 1552gh                                   |
| LC (60%)          | 6.22abc   | 5.24i                       | 90.9fg         | 0.158ef                    | 424fg                         | 181gh                | 48.5e         | 62.7e     | 3.31k     | 2341ef                       | 793c                          | 9382f                                                 | 3818j                                                  | 2357i                                    |
| LC (80%)          | 6.10a     | 6.42k                       | 89.7def        | 0.180g                     | 411ef                         | 18.4gh               | 48.6e         | 62.1de    | 3.49l     | 3046g                        | 1284d                         | 11675g                                                | 3289i                                                  | 2637ij                                   |
| LC (100%)         | 6.05a     | 5.57ij                      | 88.7cd         | 0.200h                     | 404ef                         | 17.3fgh              | 48.2e         | 60.1c     | 3.35kl    | 3575h                        | 1649e                         | 13717h                                                | 3764j                                                  | 2898jk                                   |
| TC (20%)          | 6.83efg   | 2.27ef                      | 92.9hij        | 0.123d                     | 494j                          | 18.4gh               | 43.4d         | 65.9f     | 1.48f     | 1737d                        | 1473de                        | 1603b                                                 | 1548f                                                  | 939de                                    |
| TC (40%)          | 6.80efg   | 3.04g                       | 90.3ef         | 0.171g                     | 558l                          | 17.1fgh              | 34.4c         | 61.2d     | 1.67g     | 2341ef                       | 1309d                         | 2554bc                                                | 2360h                                                  | 1245efg                                  |
| TC (60%)          | 6.65bcde  | 4.35h                       | 87.9cd         | 0.222i                     | 616m                          | 20.5hi               | 26.3b         | 54.0b     | 1.84h     | 2870g                        | 1561e                         | 2848c                                                 | 2563h                                                  | 1310fg                                   |
| TC (80%)          | 6.73de    | 5.96jk                      | 85.3b          | 0.282j                     | 660n                          | 22.7ij               | 19.4a         | 45.7a     | 1.87h     | 4129h                        | 2241f                         | 6730e                                                 | 3707j                                                  | 3045k                                    |
| TC (100%)         | 6.77ef    | 6.51k                       | 84.1a          | 0.301k                     | 657n                          | 24.4j                | 18.3a         | 46.3a     | 1.87h     | 3046g                        | 1636e                         | 8783f                                                 | 3781j                                                  | 4011l                                    |
| ANOVA             | ***       | ***                         | ***            | ***                        | ***                           | ***                  | ***           | ***       | ***       | ***                          | ***                           | ***                                                   | ***                                                    | ***                                      |

Mean values (n =4) in columns followed by the same letter are not statistically significant according to the Tukey-b test. \*\*\*: significant at  $p < 0.001$ .

**Table S2.** Germination and morphological characteristics of lettuce seedlings grown in the substrates studied analysed with ANOVA and post-hoc Tukey-b test.

| <b>Substrates</b> | <b>GI (%)</b> | <b>H (cm)</b> | <b>AFW (g)</b> | <b>ADW (g)</b> | <b>RFW (g)</b> | <b>RDW (g)</b> |
|-------------------|---------------|---------------|----------------|----------------|----------------|----------------|
| Coir fibre (100%) | 99.5c         | 2.70i         | 0.293ef        | 0.030gh        | 0.283h         | 0.029j         |
| PL (20%)          | 99.7c         | 1.83fg        | 0.105abc       | 0.011bc        | 0.112c         | 0.011de        |
| PL (40%)          | 99.4c         | 1.30bc        | 0.070ab        | 0.006ab        | 0.063b         | 0.008bc        |
| PL (60%)          | 99.4c         | 1.03a         | 0.046a         | 0.004a         | 0.049ab        | 0.004a         |
| PL (80%)          | 98.5c         | 0.88a         | 0.049a         | 0.004a         | 0.061b         | 0.008bc        |
| PL (100%)         | 98.7c         | 0.87a         | 0.037a         | 0.003a         | 0.032a         | 0.005ab        |
| PT (20%)          | 98.1c         | 1.93g         | 0.257def       | 0.025fg        | 0.242f         | 0.025i         |
| PT (40%)          | 99.4c         | 2.30h         | 0.290def       | 0.030gh        | 0.262fgh       | 0.030j         |
| PT (60%)          | 97.9c         | 1.91g         | 0.263def       | 0.027gh        | 0.190e         | 0.020fg        |
| PT (80%)          | 96.2c         | 1.58de        | 0.211cde       | 0.021ef        | 0.170de        | 0.019f         |
| PT (100%)         | 94.3c         | 1.26bc        | 0.187cde       | 0.018de        | 0.170de        | 0.022fgh       |
| LC (20%)          | 99.7c         | 4.49l         | 0.941i         | 0.060k         | 0.380i         | 0.031j         |
| LC (40%)          | 98.2c         | 3.35j         | 0.595g         | 0.046i         | 0.441j         | 0.039k         |
| LC (60%)          | 97.9c         | 2.18h         | 0.554g         | 0.032h         | 0.275gh        | 0.023ghi       |
| LC (80%)          | 74.6b         | 1.57de        | 0.251def       | 0.016de        | 0.156d         | 0.009cd        |
| LC (100%)         | 21.1a         | 1.37cd        | 0.203cde       | 0.012cd        | 0.080b         | 0.007abc       |
| TC (20%)          | 99.4c         | 3.82k         | 0.737h         | 0.051j         | 0.390i         | 0.032j         |
| TC (40%)          | 98.8c         | 2.73i         | 0.613g         | 0.043i         | 0.262fgh       | 0.021fgh       |
| TC (60%)          | 98.4c         | 2.37h         | 0.357f         | 0.025fg        | 0.247fg        | 0.024hi        |
| TC (80%)          | 68.9b         | 1.64ef        | 0.294ef        | 0.017de        | 0.149d         | 0.013e         |
| TC (100%)         | 21.7a         | 1.08ab        | 0.172bcd       | 0.010bc        | 0.064b         | 0.005ab        |
| <i>ANOVA</i>      | ***           | ***           | ***            | ***            | ***            | ***            |

Mean values (n =4) in columns followed by the same letter are not statistically significant according to the Tukey-b test. \*\*\*: significant at  $p < 0.001$ .
